# Supplementary material for: Test–re-test reliability and inter-rater reliability of a digital pelvic inclinometer in young, healthy males and females
Source: PeerJ. 2016 Mar 31;4:e1881. doi: 10.7717/peerj.1881 (PMC4824902; doi:10.7717/peerj.1881)
Supplement: Supplemental Information 1 [file peerj-04-1881-s001.xlsx]

## Sheet: Tester 1 (a1)
Left	Right
13	15
19.5	20.2
8.3	10
9.3	11.5
10.6	14
14	12.4
11	9.2
10.7	6.8
9.9	8.9
12.8	17.3
1.5	3.3
10.9	9.8
15.9	16
7.4	11.5
15.1	15.2
16.7	18.2
10.8	11.6

## Sheet: Tester 1 (a2)
Left	Right
13.9	13
19.8	20.5
8.8	9.8
10	12
11.2	13.8
13.6	11.8
12	10.3
12.1	7.1
10.3	9.2
16.1	16.8
1.3	2.5
11.2	10.3
14.3	15.2
8	6.4
17.3	17
16.5	17.8
10.5	11

## Sheet: Tester 1 (a3)
Left	Right
15.3	14
20.7	19.8
9	10.5
11.5	12.7
11.6	14.6
13.5	12.1
11.8	10
13.6	10.5
10.3	9
15.9	16.7
2.2	3.1
11	9.9
15.3	15.2
8	6.5
17.9	17.5
15.9	16.8
10	10.9

## Sheet: Tester 2 (a1)
Left	Right
9.5	10.5
14.5	17.5
15	7
17.5	8.5
16.5	18
18	12.5
9	10
12.5	3.5
12	7.5
15	12.5
1	-3
10	8.5
15	14
9	3
18.5	9
13.5	11.5
8	5.5

## Sheet: Tester 2 (a2)
Left	Right
11	9.5
15	17
14	6.5
16.5	9
24.5	18
16	14
9	9.5
12	3.5
13	8.5
13.5	11.5
0.5	-3.5
10	8
15	12
9	3.5
18	10
14.5	10.5
8.5	6

## Sheet: Tester 2 (a3)
Left	Right
10	9.5
15	16
15	5.5
17.5	7.5
26	17.5
16	14
9.5	10
12.5	3.5
11.5	7
15.5	11.5
0.5	-2.5
10	7.5
15.5	12.5
9	3.5
18	10
15	10
8.5	5
